# Supplementary material for: Establishment of Sandwich ELISA for Quality Control in Rotavirus Vaccine Production
Source: MDPI journal article supplement (doi:10.3390/vaccines10020243), 2022-02-05
Supplement: s1 [file s1]

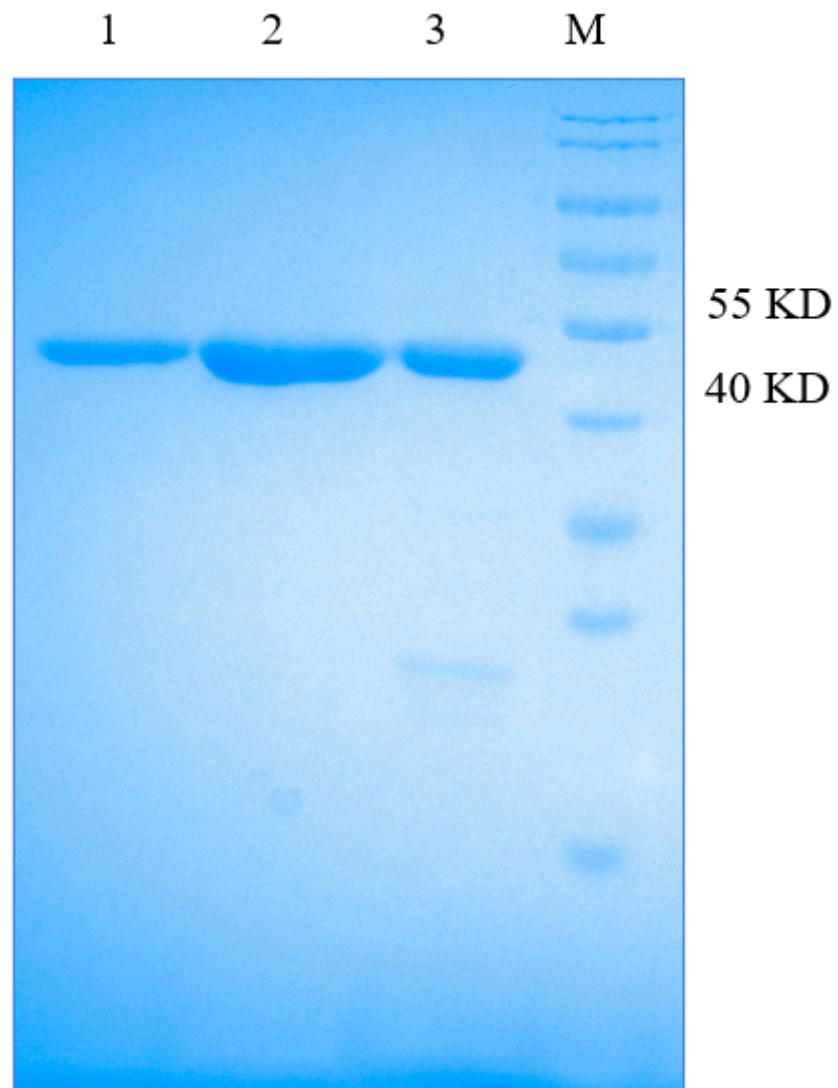

**Figure S1.** SDS-PAGE characterization of purified P[4], P[6], P[8]-VP4\*. Lanes 1-3 represent the samples of purified P[6]-VP4\*, P[8]-VP4\*, P[4]-VP4\* proteins respectively.

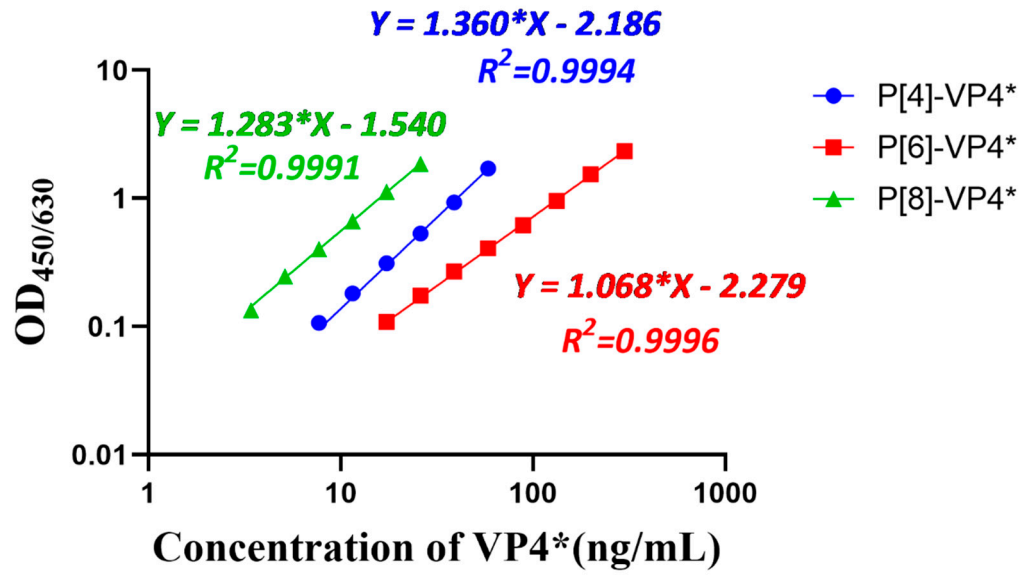

**Figure S2.** Standard curve of sandwich ELISA for P[4], P[6], P[8]-VP4\*. Purified VP4\* proteins were 1.5-fold serially diluted. The error bars represent the standard error of each group (n=3).
