# Supplementary material for: Establishment of Sandwich ELISA for Quality Control in Rotavirus Vaccine Production
Source: MDPI journal article supplement (doi:10.3390/vaccines10020243), 2022-02-05
Supplement: s1 [file s1]

**Table S1. Reactivity of monoclonal antibodies (mAbs) to the three genotype recombinant VP4\* antigens**

| Clone  | Subclass | Means | EC <sub>50</sub> ( µg/mL) * |            |            |
|--------|----------|-------|-----------------------------|------------|------------|
|        |          |       | P[4]-VP4 *                  | P[6]-VP4 * | P[8]-VP4 * |
| 7E3    | IgG2a    | ELISA | 1.124                       | >100       | 97.01      |
| 5F6    | IgG2b    | ELISA | 1.29                        | 23.18      | 21.27      |
| 5D8    | IgG1     | ELISA | 0.01                        | >100       | >100       |
| 1E9    | IgG1     | ELISA | >100                        | 0.04       | >100       |
| 3D4    | IgG1     | ELISA | >100                        | 0.27       | >100       |
| 18E1   | IgG2b    | ELISA | 22.21                       | 15.8       | 0.52       |
| 2C5    | IgG1     | ELISA | 35.26                       | 87.32      | 0.31       |
| 6C6    | IgG2b    | ELISA | >100                        | >100       | 0.47       |
| 15D9   | IgG2b    | ELISA | 31.62                       | 26.3       | 1.32       |
| 5F10-1 | IgG1     | ELISA | 33.2                        | 39.62      | 0.18       |

\* The binding activity of mAbs to VP4 protein belonging to different P genotype. The EC<sub>50</sub> value for each mAb combination was shown. Sample with no reactivity are indicated by ">100" (the highest tested mAb concentration).
